# Supplementary material for: In silico prediction of targets for anti-angiogenesis and their in vitro evaluation confirm the involvement of SOD3 in angiogenesis
Source: PubMed Central journal article supplement (PMC5915121; doi:10.18632/oncotarget.24693), 2018-04-03
Supplement: oncotarget-09-17349-s001.pdf [file oncotarget-09-17349-s001.pdf]

## ***In silico* prediction of targets for anti-angiogenesis and their *in vitro* evaluation confirm the involvement of SOD3 in angiogenesis**

### **SUPPLEMENTARY MATERIALS**

**Supplementary Table 1: DAVID Functional Annotation Table for SOD3.**

See Supplementary File 1
