# Supplementary material for: In silico prediction of targets for anti-angiogenesis and their in vitro evaluation confirm the involvement of SOD3 in angiogenesis
Source: PubMed Central journal article supplement (PMC5915121; doi:10.18632/oncotarget.24693), 2018-04-03
Supplement: oncotarget-09-17349-s002.pdf [file oncotarget-09-17349-s002.pdf]

| SOD3            | Superoxide dismutase                                                                                                                                                                                                                                                                                                                                                                                                                                                                                                                                            | Related Genes | Xanthomonas campestris        |
|-----------------|-----------------------------------------------------------------------------------------------------------------------------------------------------------------------------------------------------------------------------------------------------------------------------------------------------------------------------------------------------------------------------------------------------------------------------------------------------------------------------------------------------------------------------------------------------------------|---------------|-------------------------------|
| COG_ONTOLOGY    | <a href="#">Inorganic ion transport and metabolism,</a>                                                                                                                                                                                                                                                                                                                                                                                                                                                                                                         |               |                               |
| GOTERM_BP_FAT   | <a href="#">oxygen and reactive oxygen species metabolic process,</a> <a href="#">superoxide metabolic process,</a> <a href="#">oxidation reduction,</a>                                                                                                                                                                                                                                                                                                                                                                                                        |               |                               |
| GOTERM_MF_FAT   | <a href="#">superoxide dismutase activity,</a> <a href="#">antioxidant activity,</a> <a href="#">oxidoreductase activity,</a> <a href="#">acting on superoxide radicals as acceptor,</a> <a href="#">ion binding,</a> <a href="#">cation binding,</a> <a href="#">metal ion binding,</a>                                                                                                                                                                                                                                                                        |               |                               |
| INTERPRO        | <a href="#">Manganese/iron superoxide dismutase,</a> <a href="#">Manganese/iron superoxide dismutase,</a> <a href="#">N-terminal,</a> <a href="#">Manganese/iron superoxide dismutase,</a> <a href="#">C-terminal,</a> <a href="#">Manganese/iron superoxide dismutase,</a> <a href="#">binding site,</a>                                                                                                                                                                                                                                                       |               |                               |
| PIR_SUPERFAMILY | PIRSF000349:SODismutase,                                                                                                                                                                                                                                                                                                                                                                                                                                                                                                                                        |               |                               |
| SP_PIR_KEYWORDS | <a href="#">complete proteome,</a> <a href="#">oxidoreductase,</a>                                                                                                                                                                                                                                                                                                                                                                                                                                                                                              |               |                               |
| SOD3            | Superoxide dismutase [Cu-Zn]                                                                                                                                                                                                                                                                                                                                                                                                                                                                                                                                    | Related Genes | Anopheles gambiae             |
| GOTERM_BP_FAT   | <a href="#">oxygen and reactive oxygen species metabolic process,</a> <a href="#">superoxide metabolic process,</a> <a href="#">oxidation reduction,</a>                                                                                                                                                                                                                                                                                                                                                                                                        |               |                               |
| GOTERM_MF_FAT   | <a href="#">superoxide dismutase activity,</a> <a href="#">copper ion binding,</a> <a href="#">zinc ion binding,</a> <a href="#">antioxidant activity,</a> <a href="#">oxidoreductase activity,</a> <a href="#">acting on superoxide radicals as acceptor,</a> <a href="#">ion binding,</a> <a href="#">cation binding,</a> <a href="#">metal ion binding,</a> <a href="#">transition metal ion binding,</a>                                                                                                                                                    |               |                               |
| INTERPRO        | <a href="#">Superoxide dismutase,</a> <a href="#">copper/zinc binding,</a> <a href="#">Superoxide dismutase,</a> <a href="#">copper/zinc,</a> <a href="#">binding site,</a>                                                                                                                                                                                                                                                                                                                                                                                     |               |                               |
| PIR_SUPERFAMILY | PIRSF000348:superoxide dismutase [Cu-Zn],                                                                                                                                                                                                                                                                                                                                                                                                                                                                                                                       |               |                               |
| SP_PIR_KEYWORDS | <a href="#">complete proteome,</a> <a href="#">copper,</a> <a href="#">metal-binding,</a> <a href="#">oxidoreductase,</a> <a href="#">zinc,</a>                                                                                                                                                                                                                                                                                                                                                                                                                 |               |                               |
| SOD3            | hypothetical protein LOC100127868                                                                                                                                                                                                                                                                                                                                                                                                                                                                                                                               | Related Genes | Xenopus (Silurana) tropicalis |
| GOTERM_BP_FAT   | <a href="#">oxygen and reactive oxygen species metabolic process,</a> <a href="#">superoxide metabolic process,</a> <a href="#">oxidation reduction,</a>                                                                                                                                                                                                                                                                                                                                                                                                        |               |                               |
| GOTERM_MF_FAT   | <a href="#">superoxide dismutase activity,</a> <a href="#">copper ion binding,</a> <a href="#">zinc ion binding,</a> <a href="#">antioxidant activity,</a> <a href="#">oxidoreductase activity,</a> <a href="#">acting on superoxide radicals as acceptor,</a> <a href="#">ion binding,</a> <a href="#">cation binding,</a> <a href="#">metal ion binding,</a> <a href="#">transition metal ion binding,</a>                                                                                                                                                    |               |                               |
| INTERPRO        | <a href="#">Superoxide dismutase,</a> <a href="#">copper/zinc binding,</a> <a href="#">Superoxide dismutase,</a> <a href="#">copper/zinc,</a> <a href="#">binding site,</a>                                                                                                                                                                                                                                                                                                                                                                                     |               |                               |
| SP_PIR_KEYWORDS | <a href="#">copper,</a> <a href="#">metal-binding,</a> <a href="#">oxidoreductase,</a> <a href="#">zinc,</a>                                                                                                                                                                                                                                                                                                                                                                                                                                                    |               |                               |
| SOD3            | similar to extracellular-superoxide dismutase (EC 1.15.1.1); superoxide dismutase 3, extracellular                                                                                                                                                                                                                                                                                                                                                                                                                                                              | Related Genes | Gallus gallus                 |
| GOTERM_BP_FAT   | <a href="#">oxygen and reactive oxygen species metabolic process,</a> <a href="#">superoxide metabolic process,</a> <a href="#">oxidation reduction,</a>                                                                                                                                                                                                                                                                                                                                                                                                        |               |                               |
| GOTERM_MF_FAT   | <a href="#">ion binding,</a> <a href="#">cation binding,</a> <a href="#">metal ion binding,</a>                                                                                                                                                                                                                                                                                                                                                                                                                                                                 |               |                               |
| SOD3            | superoxide dismutase 3, extracellular                                                                                                                                                                                                                                                                                                                                                                                                                                                                                                                           | Related Genes | Bos taurus                    |
| GOTERM_BP_FAT   | <a href="#">response to hypoxia,</a> <a href="#">oxygen and reactive oxygen species metabolic process,</a> <a href="#">superoxide metabolic process,</a> <a href="#">oxidation reduction,</a> <a href="#">response to oxygen levels,</a>                                                                                                                                                                                                                                                                                                                        |               |                               |
| GOTERM_CC_FAT   | <a href="#">extracellular region,</a> <a href="#">extracellular space,</a> <a href="#">Golgi apparatus,</a> <a href="#">trans-Golgi network,</a> <a href="#">extracellular region part,</a> <a href="#">Golgi apparatus part,</a>                                                                                                                                                                                                                                                                                                                               |               |                               |
| GOTERM_MF_FAT   | <a href="#">superoxide dismutase activity,</a> <a href="#">copper ion binding,</a> <a href="#">zinc ion binding,</a> <a href="#">antioxidant activity,</a> <a href="#">oxidoreductase activity,</a> <a href="#">acting on superoxide radicals as acceptor,</a> <a href="#">ion binding,</a> <a href="#">cation binding,</a> <a href="#">metal ion binding,</a> <a href="#">transition metal ion binding,</a>                                                                                                                                                    |               |                               |
| INTERPRO        | <a href="#">Superoxide dismutase,</a> <a href="#">copper/zinc binding,</a> <a href="#">Superoxide dismutase,</a> <a href="#">copper/zinc,</a> <a href="#">binding site,</a>                                                                                                                                                                                                                                                                                                                                                                                     |               |                               |
| SP_PIR_KEYWORDS | <a href="#">copper,</a> <a href="#">metal-binding,</a> <a href="#">oxidoreductase,</a> <a href="#">zinc,</a>                                                                                                                                                                                                                                                                                                                                                                                                                                                    |               |                               |
| SOD3            | superoxide dismutase 3, extracellular                                                                                                                                                                                                                                                                                                                                                                                                                                                                                                                           | Related Genes | Rattus norvegicus             |
| GOTERM_BP_FAT   | <a href="#">response to reactive oxygen species,</a> <a href="#">response to superoxide,</a> <a href="#">response to oxygen radical,</a> <a href="#">response to hypoxia,</a> <a href="#">oxygen and reactive oxygen species metabolic process,</a> <a href="#">superoxide metabolic process,</a> <a href="#">response to oxidative stress,</a> <a href="#">response to inorganic substance,</a> <a href="#">response to metal ion,</a> <a href="#">response to copper ion,</a> <a href="#">oxidation reduction,</a> <a href="#">response to oxygen levels,</a> |               |                               |
| GOTERM_CC_FAT   | <a href="#">extracellular region,</a> <a href="#">extracellular space,</a> <a href="#">Golgi apparatus,</a> <a href="#">trans-Golgi network,</a> <a href="#">extracellular matrix,</a> <a href="#">extracellular region part,</a> <a href="#">Golgi apparatus part,</a>                                                                                                                                                                                                                                                                                         |               |                               |
| GOTERM_MF_FAT   | <a href="#">superoxide dismutase activity,</a> <a href="#">copper ion binding,</a> <a href="#">zinc ion binding,</a> <a href="#">antioxidant activity,</a> <a href="#">oxidoreductase activity,</a> <a href="#">acting on superoxide radicals as acceptor,</a> <a href="#">ion binding,</a> <a href="#">cation binding,</a> <a href="#">metal ion binding,</a> <a href="#">transition metal ion binding,</a>                                                                                                                                                    |               |                               |
| INTERPRO        | <a href="#">Superoxide dismutase,</a> <a href="#">copper/zinc binding,</a> <a href="#">Superoxide dismutase,</a> <a href="#">copper/zinc,</a> <a href="#">binding site,</a>                                                                                                                                                                                                                                                                                                                                                                                     |               |                               |
| PIR_SUPERFAMILY | PIRSF000348:superoxide dismutase [Cu-Zn],                                                                                                                                                                                                                                                                                                                                                                                                                                                                                                                       |               |                               |
| SP_PIR_KEYWORDS | <a href="#">antioxidant,</a> <a href="#">copper,</a> <a href="#">disulfide bond,</a> <a href="#">glycoprotein,</a> <a href="#">metal-binding,</a> <a href="#">metalloprotein,</a> <a href="#">oxidoreductase,</a> <a href="#">Secreted,</a> <a href="#">signal,</a> <a href="#">zinc,</a>                                                                                                                                                                                                                                                                       |               |                               |
| UP_SEQ_FEATURE  | chain:Extracellular superoxide dismutase [Cu- Zn], disulfide bond, glycosylation site:N-linked (GlcNAc...), metal ion-binding site:Copper; catalytic, metal ion-binding site:Zinc; structural, mutagenesis site, sequence conflict, signal peptide,                                                                                                                                                                                                                                                                                                             |               |                               |
| SOD3            | superoxide dismutase 3, extracellular                                                                                                                                                                                                                                                                                                                                                                                                                                                                                                                           | Related Genes | Mus musculus                  |
| GOTERM_BP_FAT   | <a href="#">response to hypoxia,</a> <a href="#">oxygen and reactive oxygen species metabolic process,</a> <a href="#">superoxide metabolic process,</a> <a href="#">oxidation reduction,</a> <a href="#">response to oxygen levels,</a>                                                                                                                                                                                                                                                                                                                        |               |                               |
| GOTERM_CC_FAT   | <a href="#">extracellular region,</a> <a href="#">extracellular space,</a> <a href="#">Golgi apparatus,</a> <a href="#">trans-Golgi network,</a> <a href="#">extracellular region part,</a> <a href="#">Golgi apparatus part,</a>                                                                                                                                                                                                                                                                                                                               |               |                               |
| GOTERM_MF_FAT   | <a href="#">superoxide dismutase activity,</a> <a href="#">copper ion binding,</a> <a href="#">zinc ion binding,</a> <a href="#">antioxidant activity,</a> <a href="#">oxidoreductase activity,</a> <a href="#">acting on superoxide radicals as acceptor,</a> <a href="#">ion binding,</a> <a href="#">cation binding,</a> <a href="#">metal ion binding,</a> <a href="#">transition metal ion binding,</a>                                                                                                                                                    |               |                               |
| INTERPRO        | <a href="#">Superoxide dismutase,</a> <a href="#">copper/zinc binding,</a> <a href="#">Superoxide dismutase,</a> <a href="#">copper/zinc,</a> <a href="#">binding site,</a>                                                                                                                                                                                                                                                                                                                                                                                     |               |                               |
| PIR_SUPERFAMILY | PIRSF000348:superoxide dismutase [Cu-Zn],                                                                                                                                                                                                                                                                                                                                                                                                                                                                                                                       |               |                               |
| SP_PIR_KEYWORDS | <a href="#">3d-structure,</a> <a href="#">antioxidant,</a> <a href="#">copper,</a> <a href="#">direct protein sequencing,</a> <a href="#">disulfide bond,</a> <a href="#">glycoprotein,</a> <a href="#">metal-binding,</a> <a href="#">oxidoreductase,</a> <a href="#">Secreted,</a> <a href="#">signal,</a> <a href="#">zinc,</a>                                                                                                                                                                                                                              |               |                               |
| UP_SEQ_FEATURE  | chain:Extracellular superoxide dismutase [Cu- Zn], disulfide bond, glycosylation site:N-linked (GlcNAc...), metal ion-binding site:Copper; catalytic, metal ion-binding site:Zinc; structural, signal peptide,                                                                                                                                                                                                                                                                                                                                                  |               |                               |
| SOD3            | superoxide dismutase 3, extracellular                                                                                                                                                                                                                                                                                                                                                                                                                                                                                                                           | Related Genes | Oryctolagus cuniculus         |
| GOTERM_BP_FAT   | <a href="#">response to hypoxia,</a> <a href="#">oxygen and reactive oxygen species metabolic process,</a> <a href="#">superoxide metabolic process,</a> <a href="#">oxidation reduction,</a> <a href="#">response to oxygen levels,</a>                                                                                                                                                                                                                                                                                                                        |               |                               |
| GOTERM_CC_FAT   | <a href="#">extracellular region,</a> <a href="#">extracellular space,</a> <a href="#">Golgi apparatus,</a> <a href="#">trans-Golgi network,</a> <a href="#">extracellular region part,</a> <a href="#">Golgi apparatus part,</a>                                                                                                                                                                                                                                                                                                                               |               |                               |
| GOTERM_MF_FAT   | <a href="#">superoxide dismutase activity,</a> <a href="#">copper ion binding,</a> <a href="#">zinc ion binding,</a> <a href="#">antioxidant activity,</a> <a href="#">oxidoreductase activity,</a> <a href="#">acting on superoxide radicals as acceptor,</a> <a href="#">ion binding,</a> <a href="#">cation binding,</a> <a href="#">metal ion binding,</a> <a href="#">transition metal ion binding,</a>                                                                                                                                                    |               |                               |

|                 |                                                                                                                                                                                                                                                                                                                                                                                                                                                                                                                                                                                                       |                                      |                                     |
|-----------------|-------------------------------------------------------------------------------------------------------------------------------------------------------------------------------------------------------------------------------------------------------------------------------------------------------------------------------------------------------------------------------------------------------------------------------------------------------------------------------------------------------------------------------------------------------------------------------------------------------|--------------------------------------|-------------------------------------|
| INTERPRO        | <a href="#">Superoxide dismutase, copper/zinc binding</a> , <a href="#">Superoxide dismutase, copper/zinc, binding site</a> ,                                                                                                                                                                                                                                                                                                                                                                                                                                                                         |                                      |                                     |
| PIR_SUPERFAMILY | PIRSF000348:superoxide dismutase [Cu-Zn],                                                                                                                                                                                                                                                                                                                                                                                                                                                                                                                                                             |                                      |                                     |
| SP_PIR_KEYWORDS | <a href="#">antioxidant</a> , <a href="#">copper</a> , <a href="#">disulfide bond</a> , <a href="#">glycoprotein</a> , <a href="#">metal-binding</a> , <a href="#">oxidoreductase</a> , <a href="#">Secreted</a> , <a href="#">signal</a> , <a href="#">zinc</a> ,                                                                                                                                                                                                                                                                                                                                    |                                      |                                     |
| UP_SEQ_FEATURE  | chain:Extracellular superoxide dismutase [Cu- Zn], disulfide bond, glycosylation site:N-linked (GlcNAc...), metal ion-binding site:Copper; catalytic, metal ion-binding site:Zinc; structural, sequence conflict, signal peptide,                                                                                                                                                                                                                                                                                                                                                                     |                                      |                                     |
| <b>SOD3</b>     | <b><a href="#">superoxide dismutase 3, extracellular</a></b>                                                                                                                                                                                                                                                                                                                                                                                                                                                                                                                                          | <b><a href="#">Related Genes</a></b> | <b><a href="#">Homo sapiens</a></b> |
| BIOCARTA        | <a href="#">The IGF-1 Receptor and Longevity</a> ,                                                                                                                                                                                                                                                                                                                                                                                                                                                                                                                                                    |                                      |                                     |
| GOTERM_BP_FAT   | <a href="#">response to hypoxia</a> , <a href="#">oxygen and reactive oxygen species metabolic process</a> , <a href="#">superoxide metabolic process</a> , <a href="#">response to inorganic substance</a> , <a href="#">response to metal ion</a> , <a href="#">response to copper ion</a> , <a href="#">oxidation reduction</a> , <a href="#">response to oxygen levels</a> ,                                                                                                                                                                                                                      |                                      |                                     |
| GOTERM_CC_FAT   | <a href="#">cell fraction</a> , <a href="#">extracellular region</a> , <a href="#">extracellular space</a> , <a href="#">soluble fraction</a> , <a href="#">Golgi apparatus</a> , <a href="#">trans-Golgi network</a> , <a href="#">extracellular matrix</a> , <a href="#">extracellular region part</a> , <a href="#">Golgi apparatus part</a> ,                                                                                                                                                                                                                                                     |                                      |                                     |
| GOTERM_MF_FAT   | <a href="#">pattern binding</a> , <a href="#">superoxide dismutase activity</a> , <a href="#">copper ion binding</a> , <a href="#">glycosaminoglycan binding</a> , <a href="#">heparin binding</a> , <a href="#">zinc ion binding</a> , <a href="#">antioxidant activity</a> , <a href="#">oxidoreductase activity, acting on superoxide radicals as acceptor</a> , <a href="#">carbohydrate binding</a> , <a href="#">polysaccharide binding</a> , <a href="#">ion binding</a> , <a href="#">cation binding</a> , <a href="#">metal ion binding</a> , <a href="#">transition metal ion binding</a> , |                                      |                                     |
| INTERPRO        | <a href="#">Superoxide dismutase, copper/zinc binding</a> , <a href="#">Superoxide dismutase, copper/zinc, binding site</a> ,                                                                                                                                                                                                                                                                                                                                                                                                                                                                         |                                      |                                     |
| OMIM_DISEASE    | <a href="#">Superoxide dismutase, elevated extracellular</a> ,                                                                                                                                                                                                                                                                                                                                                                                                                                                                                                                                        |                                      |                                     |
| PIR_SUPERFAMILY | PIRSF000348:superoxide dismutase [Cu-Zn],                                                                                                                                                                                                                                                                                                                                                                                                                                                                                                                                                             |                                      |                                     |
| SP_PIR_KEYWORDS | <a href="#">3d-structure</a> , <a href="#">antioxidant</a> , <a href="#">complete proteome</a> , <a href="#">copper</a> , <a href="#">direct protein sequencing</a> , <a href="#">disulfide bond</a> , <a href="#">glycation</a> , <a href="#">glycoprotein</a> , <a href="#">heparin-binding</a> , <a href="#">metal-binding</a> , <a href="#">metalloprotein</a> , <a href="#">oxidoreductase</a> , <a href="#">polymorphism</a> , <a href="#">Secreted</a> , <a href="#">signal</a> , <a href="#">zinc</a> ,                                                                                       |                                      |                                     |
| UP_SEQ_FEATURE  | chain:Extracellular superoxide dismutase [Cu- Zn], disulfide bond, glycosylation site:N-linked (Glc) (glycation); in vitro, glycosylation site:N-linked (GlcNAc...), helix, metal ion-binding site:Copper; catalytic, metal ion-binding site:Zinc; structural, sequence variant, signal peptide, site:Not glycated, strand,                                                                                                                                                                                                                                                                           |                                      |                                     |
| <b>SOD3</b>     | <b><a href="#">superoxide dismutase3</a></b>                                                                                                                                                                                                                                                                                                                                                                                                                                                                                                                                                          | <b><a href="#">Related Genes</a></b> | <b><a href="#">Zea mays</a></b>     |
| COG_ONTOLOGY    | <a href="#">Inorganic ion transport and metabolism</a> ,                                                                                                                                                                                                                                                                                                                                                                                                                                                                                                                                              |                                      |                                     |
| GOTERM_BP_FAT   | <a href="#">oxygen and reactive oxygen species metabolic process</a> , <a href="#">superoxide metabolic process</a> , <a href="#">oxidation reduction</a> ,                                                                                                                                                                                                                                                                                                                                                                                                                                           |                                      |                                     |
| GOTERM_CC_FAT   | <a href="#">mitochondrion</a> , <a href="#">mitochondrial matrix</a> , <a href="#">membrane-enclosed lumen</a> , <a href="#">mitochondrial lumen</a> , <a href="#">organelle lumen</a> , <a href="#">mitochondrial part</a> , <a href="#">intracellular organelle lumen</a> ,                                                                                                                                                                                                                                                                                                                         |                                      |                                     |
| GOTERM_MF_FAT   | <a href="#">superoxide dismutase activity</a> , <a href="#">antioxidant activity</a> , <a href="#">oxidoreductase activity, acting on superoxide radicals as acceptor</a> , <a href="#">manganese ion binding</a> , <a href="#">ion binding</a> , <a href="#">cation binding</a> , <a href="#">metal ion binding</a> , <a href="#">transition metal ion binding</a> ,                                                                                                                                                                                                                                 |                                      |                                     |
| INTERPRO        | <a href="#">Manganese/iron superoxide dismutase</a> , <a href="#">Manganese/iron superoxide dismutase, N-terminal</a> , <a href="#">Manganese/iron superoxide dismutase, C-terminal</a> , <a href="#">Manganese/iron superoxide dismutase, binding site</a> ,                                                                                                                                                                                                                                                                                                                                         |                                      |                                     |
| PIR_SUPERFAMILY | PIRSF000349:SODismutase, PIRSF000349:superoxide dismutase, Mn/Fe specific,                                                                                                                                                                                                                                                                                                                                                                                                                                                                                                                            |                                      |                                     |
| SP_PIR_KEYWORDS | <a href="#">manganese</a> , <a href="#">metal-binding</a> , <a href="#">mitochondrion</a> , <a href="#">oxidoreductase</a> , <a href="#">transit peptide</a> ,                                                                                                                                                                                                                                                                                                                                                                                                                                        |                                      |                                     |
| UP_SEQ_FEATURE  | chain:Superoxide dismutase [Mn] 3.1, mitochondrial, metal ion-binding site:Manganese, transit peptide:Mitochondrion,                                                                                                                                                                                                                                                                                                                                                                                                                                                                                  |                                      |                                     |
